# Supplementary material
Source: Springer Nature journal article supplement (https://www.springermedizin.de/resource/supplementary/12885_2011_2945_MOESM3_ESM.pdf/9462336)
Supplement: MOESM3 [file 9462336]

Percent survival

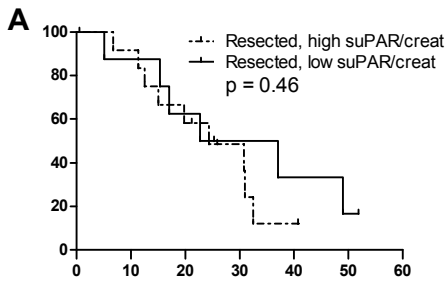

**Number at risk**

|                            |    |    |   |   |   |   |   |
|----------------------------|----|----|---|---|---|---|---|
| Resected, high suPAR/creat | 12 | 11 | 7 | 4 | 1 | 0 | 0 |
| Resected, low suPAR/creat  | 9  | 7  | 5 | 3 | 2 | 1 | 0 |

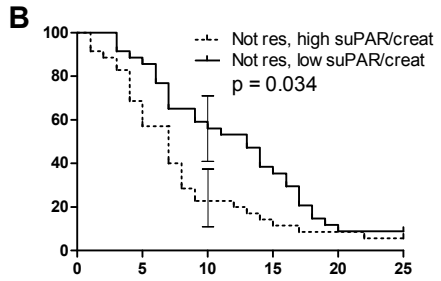

**Number at risk**

|                           |    |    |    |    |   |   |
|---------------------------|----|----|----|----|---|---|
| Not res, high suPAR/creat | 35 | 21 | 8  | 5  | 3 | 2 |
| Not res, low suPAR/creat  | 35 | 30 | 20 | 13 | 4 | 3 |

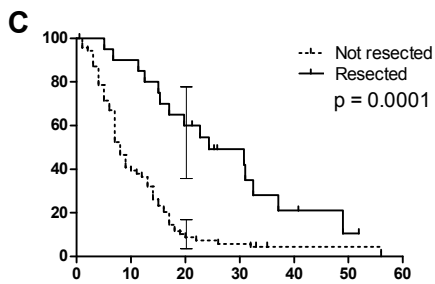

**Number at risk**

|              |    |    |    |   |   |   |   |
|--------------|----|----|----|---|---|---|---|
| Not resected | 70 | 28 | 7  | 4 | 1 | 1 | 0 |
| Resected     | 21 | 18 | 12 | 7 | 3 | 1 | 0 |

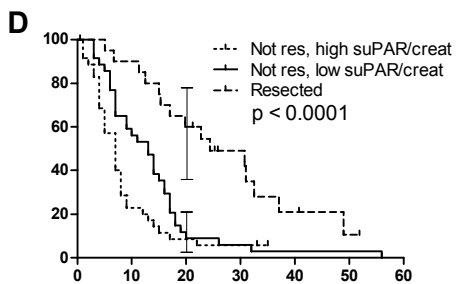

**Number at risk**

|                           |    |    |    |   |   |   |   |
|---------------------------|----|----|----|---|---|---|---|
| Not res, high suPAR/creat | 35 | 8  | 3  | 2 | 0 | 0 | 0 |
| Not res, low suPAR/creat  | 35 | 20 | 4  | 2 | 1 | 1 | 0 |
| Resected                  | 21 | 18 | 12 | 7 | 3 | 1 | 0 |

Follow-up (months from diagnosis)
